# Supplementary material for: Investigation of lipid metabolism dysregulation and the effects on immune microenvironments in pan-cancer using multiple omics data
Source: Springer Nature journal article supplement (doi:10.1186/s12859-019-2734-4), 2019-05-01
Supplement: MOESM2 [file 12859_2019_2734_MOESM2_ESM.pdf]

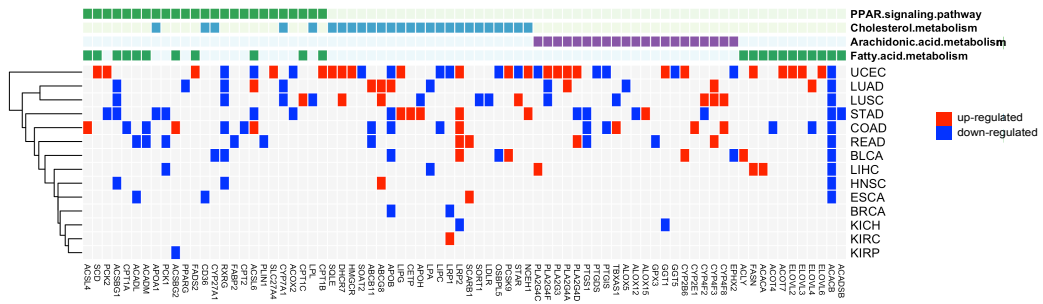

**Fig. S1. Gene expression levels with mutation frequency more than 2% and differently expressed in pan-cancer.** Genes with up-regulated or low-regulated in four pathways across multiple cancer types are respectively shown in red and blue ( $|\log_{2}FC| > 1$ ,  $FDR < 0.05$ ).
