# Supplementary material for: Investigation of lipid metabolism dysregulation and the effects on immune microenvironments in pan-cancer using multiple omics data
Source: BMC Bioinformatics. 2019 May 1;20(Suppl 7):195. doi: 10.1186/s12859-019-2734-4 (PMC6509864; doi:10.1186/s12859-019-2734-4)
Supplement: Supplementary file 1 — Lipid metabolism pathways. (XLSX 17 kb) [file 12859_2019_2734_MOESM1_ESM.xlsx]

## Sheet: lipid metabolism pathway
KEGG pathway
Pathway name	ID	Category
Fatty acid biosynthesis	hsa00061	Metabolism
Fatty acid elongation	hsa00062	Metabolism
Fatty acid degradation	hsa00071	Metabolism
Synthesis and degradation of ketone bodies	hsa00072	Metabolism
Steroid biosynthesis	hsa00100	Metabolism
Primary bile acid biosynthesis	hsa00120	Metabolism
Steroid hormone biosynthesis	hsa00140	Metabolism
Glycerophospholipid metabolism	hsa00564	Metabolism
Ether lipid metabolism	hsa00565	Metabolism
Arachidonic acid metabolism	hsa00590	Metabolism
Linoleic acid metabolism	hsa00591	Metabolism
alpha-Linolenic acid metabolism	hsa00592	Metabolism
Sphingolipid metabolism	hsa00600	Metabolism
Fatty acid metabolism	hsa01212	Metabolism
Cholesterol metabolism	hsa04979	Metabolism
Biosynthesis of unsaturated fatty acids	hsa01040	Metabolism
Glycerolipid metabolism	hsa00561	Metabolism
PPAR signaling pathway	hsa03320	Organismal Systems
Adipocytokine signaling pathway	hsa04920	Organismal Systems
Regulation of lipolysis in adipocytes	hsa04923	Organismal Systems
Fat digestion and absorption	hsa04975	Organismal Systems

## Sheet: detail
Pathway name	ID	gene
Fatty acid biosynthesis	hsa00061	ACSL1	ACSL3	ACSL4	FASN	ACSBG1	ACSL6	MCAT	ACACA	ACACB	ACSL5	OXSM	OLAH	ACSBG2
Fatty acid elongation	hsa00062	ACAA2	ACOT2	ACOT7	THEM4	ACOT4	ECHS1	HACD2	THEM5	HADHA	HADHB	HADH	HACD4	MECR	HSD17B12	HACD3	ELOVL2	PPT1	ELOVL5	ACOT1	ELOVL1	ELOVL4	ELOVL6	ELOVL7	ELOVL3	HACD1	PPT2	TECR
Fatty acid degradation	hsa00071	ACAA2	ECI2	ADH1A	ADH1B	ADH1C	CPT1C	ADH4	ADH5	ADH6	ADH7	CPT1A	CPT1B	CPT2	CYP4A11	ECI1	ECHS1	EHHADH	ALDH2	ACSL1	ACSL3	ACSL4	ALDH1B1	ALDH9A1	ALDH3A2	ACSBG1	ACSL6	GCDH	CYP4A22	ACAA1	HADHA	HADHB	HADH	ACADL	ACADM	ACADS	ACADSB	ACADVL	ACAT1	ACAT2	ALDH7A1	ACOX1	ACSL5	ACSBG2	ACOX3
Synthesis and degradation of ketone bodies	hsa00072	HMGCL	HMGCS1	HMGCS2	ACAT1	ACAT2	OXCT1	HMGCLL1	BDH2	BDH1	OXCT2
Steroid biosynthesis	hsa00100	CEL	EBP	CYP2R1	CYP24A1	CYP27B1	CYP51A1	DHCR7	DHCR24	FDFT1	LIPA	LSS	NSDHL	HSD17B7	MSMO1	SC5D	SOAT1	SQLE	TM7SF2	SOAT2
Primary bile acid biosynthesis	hsa00120	ACOT8	CYP46A1	SLC27A5	AKR1C4	CYP7A1	CYP8B1	CYP27A1	AMACR	HSD17B4	CYP39A1	BAAT	SCP2	AKR1D1	HSD3B7	ACOX2	CH25H	CYP7B1
Steroid hormone biosynthesis	hsa00140	CYP3A7-CYP3A51P	UGT2B11	UGT2A1	AKR1C4	COMT	CYP1A1	CYP1A2	CYP1B1	CYP3A7	CYP2E1	CYP3A4	CYP3A5	CYP7A1	CYP11A1	CYP11B1	CYP11B2	CYP17A1	CYP19A1	CYP21A2	AKR1C1	AKR1C2	LRTOMT	HSD3B1	HSD3B2	HSD11B1	HSD11B2	HSD17B1	HSD17B3	HSD17B2	STS	HSD17B12	HSD17B7	UGT2B28	UGT1A10	UGT1A8	UGT1A7	UGT1A6	UGT1A5	UGT1A9	UGT1A4	UGT1A1	UGT1A3	UGT2A2	SRD5A1	SRD5A2	AKR1D1	SULT1E1	SULT2B1
Glycerophospholipid metabolism	hsa00564	PLA2G4B	LPCAT3	CEPT1	CDS1	PEMT	CDIPT	LYPLA1	AGPAT1	AGPAT2	PNPLA6	CHAT	PLA2G16	CHKA	CHKB	LYPLA2	PLD4	PLA2G4E	MBOAT2	GPAT4	DGKK	GPAT2	PLB1	MBOAT1	DGKA	DGKB	DGKG	DGKH	DGKQ	PHOSPHO1	PLPP4	GPD1L	LPIN1	PLD3	PLA2G15	PISD	LCLAT1	LPCAT4	PLA2G4F	PLA2G2D	GPD1	GPD2	PLA2G4D	PLA2G2E	PNPLA7	PLA2G2C	LCAT	ACHE	PLA2G3
Ether lipid metabolism	hsa00565	PLA2G4B	CEPT1	PLA2G16	PLD4	PLA2G4E	ENPP6	PLB1	PLD3	LPCAT4	TMEM86B	PLA2G4F	PLA2G2D	PLA2G4D	GDPD1	PLA2G2E	PLA2G2C	PAFAH1B1	PLA2G3	PAFAH1B2	PAFAH1B3	PAFAH2	ENPP2	PLA2G1B	PLA2G2A	PLA2G4A	PLA2G5	PLD1	PLD2	LPCAT2	CHPT1	PLA2G2F	UGT8	GDPD3	PLA2G7	LPCAT1	PLA2G12A	PLA2G6	PLA2G10	PLA2G12B	AGPS	SELENOI	PLA2G4C	PLPP1	PLPP2	PLPP3	JMJD7-PLA2G4B	GAL3ST1
Arachidonic acid metabolism	hsa00590	PLA2G4B	PTGES3	PLA2G16	CYP4F8	CYP2U1	PLA2G4E	FAM213B	PLB1	CYP2B6	CYP2C19	CYP2C8	CYP2C9	CYP2E1	CYP2J2	CYP4A11	EPHX2	ALOX12	ALOX5	ALOX12B	ALOX15	ALOX15B	PLA2G4F	GPX6	PLA2G2D	GGT1	GGT5	HPGDS	PLA2G4D	GPX1	GPX2	GPX3	GPX5	GPX7	PLA2G2E	PLA2G2C	LTA4H	CYP4F3	LTC4S	GPX8	PLA2G3	PLA2G1B	PLA2G2A	PLA2G4A	PLA2G5	PTGDS	PTGIS	PTGS1	PTGS2
Linoleic acid metabolism	hsa00591	PLA2G4B	PLA2G16	PLA2G4E	PLB1	CYP1A2	CYP2C19	CYP2C8	CYP2C9	CYP2E1	CYP2J2	CYP3A4	ALOX15	PLA2G4F	PLA2G2D	PLA2G4D	PLA2G2E	PLA2G2C	PLA2G3	PLA2G1B	PLA2G2A	PLA2G4A	PLA2G5	PLA2G2F	PLA2G12A	PLA2G6	PLA2G10	PLA2G12B	PLA2G4C	JMJD7-PLA2G4B
alpha-Linolenic acid metabolism	hsa00592	PLA2G4B	PLA2G16	PLA2G4E	PLB1	PLA2G4F	PLA2G2D	PLA2G4D	ACAA1	PLA2G2E	PLA2G2C	PLA2G3	ACOX1	PLA2G1B	PLA2G2A	PLA2G4A	PLA2G5	PLA2G2F	PLA2G12A	ACOX3	PLA2G6	PLA2G10	PLA2G12B	PLA2G4C	JMJD7-PLA2G4B	FADS2
Sphingolipid metabolism	hsa00600	SPTLC1	CERS1	NEU3	DEGS2	ACER1	NEU4	SGPP2	SGMS2	CERS3	KDSR	CERS6	GALC	SGMS1	GBA	GLA	GLB1	CERS2	ENPP7	ACER2	ARSA	ASAH1	NEU1	NEU2	SPTLC3	ACER3	SMPD3	SMPD4	ASAH2	SPHK2	GBA2	CERK	SMPD1	SMPD2	UGCG	UGT8	CERS4	SGPP1	DEGS1	PLPP1	PLPP2	PLPP3	SPHK1	SGPL1	CERS5	B4GALT6	GAL3ST1	SPTLC2
Fatty acid metabolism	hsa01212	ACAA2	CPT1C	CPT1A	CPT1B	CPT2	ECHS1	EHHADH	HACD2	ACSL1	ACSL3	ACSL4	FASN	ACSBG1	ACSL6	MCAT	ACAA1	HADHA	HADHB	HADH	ACACA	ACADL	ACADM	ACADS	ACADSB	ACADVL	ACAT1	ACAT2	FADS1	HACD4	ACOX1	MECR	HSD17B12	HACD3	ACSL5	ELOVL2	OXSM	PPT1	PECR	ELOVL5	SCD	ELOVL6	SCD5	ACSBG2	ACOX3	HACD1	PPT2	FADS2	TECR
Adipocytokine signaling pathway	hsa04920	AKT3	CAMKK2	PPARGC1A	CHUK	CPT1C	CPT1A	CPT1B	AGRP	AKT1	AKT2	ACSL1	ACSL3	ACSL4	ACSBG1	ACSL6	MTOR	G6PC	ACACB	IKBKB	IRS1	JAK2	LEP	LEPR	NFKB1	NFKBIA	NFKBIB	NFKBIE	NPY	PCK1	PCK2	ADIPOR1	PRKAG2	ACSL5	PRKAG3	POMC	PPARA	PRKAA1	PRKAA2	PRKAB1	PRKAB2	PRKAG1	PRKCQ	MAPK8	MAPK9	MAPK10	PTPN11	G6PC2	RELA
Regulation of lipolysis in adipocytes	hsa04923	AKT3	ADCY1	ADCY2	CGA	ADCY3	ADCY5	PLA2G16	ADCY6	ADCY7	MGLL	ADCY8	ADCY9	ADORA1	ADRB1	ADRB2	ADRB3	ADCY4	AKT1	AKT2	FABP4	GNAI1	GNAI2	GNAI3	GNAS	INS	AQP7	INSR	IRS1	LIPE	NPY	NPR1	NPY1R	ABHD5	PDE3B	PIK3CA	PIK3CB	PIK3CD	PIK3R1	PIK3R2	PLIN1	PRKACA	PRKACB	PRKACG	PRKG1	PRKG2	PNPLA2	PTGER3	PTGS1
Fat digestion and absorption	hsa04975	AGPAT1	AGPAT2	CEL	SLC27A4	CLPS	ABCA1	FABP1	FABP2	PLA2G2D	GOT2	NPC1L1	PLA2G2E	APOA1	APOA4	APOB	MOGAT3	ACAT2	PLA2G2C	MTTP	PLA2G3	PLA2G1B	PLA2G2A	PLA2G5	PNLIP	PNLIPRP1	PNLIPRP2	ABCG5	ABCG8	PLA2G2F	MOGAT2	PLA2G12A	PLA2G10	PLA2G12B	DGAT2	LIPF	PLPP1	PLPP2	PLPP3	DGAT1	CD36	SCARB1
Cholesterol metabolism	hsa04979	NPC2	CETP	STARD3	OSBPL5	CYP7A1	CYP27A1	ABCA1	PCSK9	LDLRAP1	ANGPTL3	MYLIP	APOA1	APOA2	APOA4	APOB	APOC1	APOC2	APOC3	APOE	APOH	LCAT	LDLR	LIPA	LIPC	LPA	LPL	LRP1	LRP2	LRPAP1	NPC1	ANGPTL4	PLTP	ANGPTL8	NCEH1	SORT1	ABCG5	ABCG8	SOAT1	STAR	TSPO	VDAC1	VDAC2	VDAC3	SOAT2	ABCB11	VAPB	VAPA	LIPG
Biosynthesis of unsaturated fatty acids	hsa01040	ACOT2	ACOT7	ACOT4	HACD2	ACAA1	HADHA	FADS1	HACD4	ACOX1	HSD17B12	HACD3	ELOVL2	PECR	BAAT	ELOVL5	SCD	ACOT1	ELOVL6	SCD5	ACOX3	HACD1	FADS2	TECR
Glycerolipid metabolism	hsa00561	AKR1A1	AGPAT1	AGPAT2	CEL	MGLL	MOGAT1	PNLIPRP3	MBOAT2	GLYCTK	GPAT4	DGKK	GPAT2	MBOAT1	DGKA	DGKB	DGKG	DGKH	DGKQ	PLPP4	ALDH2	ALDH1B1	ALDH9A1	ALDH3A2	AKR1B1	LPIN1	LCLAT1	TKFC	GK	GK2	GLA	MOGAT3	LIPC	LPL	ALDH7A1	PNLIP	PNLIPRP1	PNLIPRP2	AGPAT5	AGK	AGPAT3	AGPAT4	AKR1B10	PNPLA2	GPAM	LPIN3	MOGAT2	PNPLA3	PLPP5
PPAR signaling pathway	hsa03320	NR1H3	SORBS1	SLC27A5	SLC27A4	SLC27A2	APOA5	PLIN2	CPT1C	CPT1A	CPT1B	CPT2	CYP7A1	CYP8B1	CYP27A1	DBI	EHHADH	FABP4	FABP1	FABP2	FABP3	FABP5	FABP6	FABP7	ACSL1	ACSL3	ACSL4	ACSBG1	ACSL6	GK	GK2	SLC27A6	ACAA1	HMGCS2	ACADL	APOA1	APOA2	ACADM	APOC3	ILK	AQP7	SLC27A1	LPL	ME1	MMP1	PLIN5	OLR1	ACOX1	PCK1
[truncated: 49 more columns]
