# Supplementary material for: Investigation of lipid metabolism dysregulation and the effects on immune microenvironments in pan-cancer using multiple omics data
Source: BMC Bioinformatics. 2019 May 1;20(Suppl 7):195. doi: 10.1186/s12859-019-2734-4 (PMC6509864; doi:10.1186/s12859-019-2734-4)
Supplement: Supplementary file 3 — Transcription factors and Targets (XLSX 35 kb) [file 12859_2019_2734_MOESM3_ESM.xlsx]

## Sheet: 工作表1
Transcription factors & Targets
Transcription factors	Targets
AHR	PTGS2
AP2B1	ADIPOQ
ATF2	APOH
ATF2	PTGS2
ATF4	PCK2
CDX2	ACAT2
CDX2	SOAT2
CEBPA	ADIPOQ
CEBPA	CETP
CEBPA	PPARG
CEBPA	APOA2
CEBPA	APOB
CEBPA	PTGS2
CEBPA	STAR
CEBPB	APOB
CEBPB	LDLR
CEBPB	PTGES
CEBPB	PTGS2
CEBPB	STAR
CREB1	HMGCR
CREB1	PCK2
CREB1	PTGS2
CREB1	STAR
CREB3L3	CYP27A1
CREB3L3	CYP7A1
CTCF	APOB
EGR1	ALOX15
EGR1	CYP2B6
EGR1	LDLR
EGR1	PDPK1
EGR1	PPARG
EGR1	PTGES
ELK1	LPA
ELK1	LPL
ESR1	CYP2C19
ESR1	CYP2C9
ESR1	APOE
ETV4	PTGS2
FOS	APOH
FOS	CYP2C9
FOS	CYP2J2
FOS	PTGS2
FOXA1	APOA1
FOXA1	APOB
FOXA2	ABCA1
FOXA2	APOA1
FOXA2	APOB
FOXL2	STAR
GATA1	ALOX15
GATA4	ABCG5
GATA4	ABCG8
GATA4	CYP2C19
GATA4	CYP2C9
GATA4	CYP2E1
GATA6	ALOX15
GATA6	CYP2C19
GATA6	CYP2C9
HES1	PTGDS
HIF1A	CBR1
HIF1A	CD36
HIF1A	GPX8
HIF1A	LRP1
HIF1A	PTGS2
HIF1A	ACADL
HIF1A	ACADM
HINFP	PCSK9
HMGA1	PTGS2
HNF1A	APOA2
HNF1A	APOB
HNF1A	ANGPTL3
HNF1A	APOH
HNF1A	CYP7A1
HNF1A	LPA
HNF1A	SOAT2
HNF1B	APOA1
HNF1B	APOB
HNF4A	APOB
HNF4A	APOC2
HNF4A	APOC3
HNF4A	CYP2C8
HNF4A	CYP2C9
HNF4A	PPARA
HNF4A	LIPC
HNF4A	CYP8B1
HNF4A	ABCG5
HNF4A	ABCG8
HNF4A	APOA1
HNF4A	APOA2
HNF4A	APOA4
HNF4A	CYP27A1
HNF4A	CYP2B6
HNF4A	CYP2C19
HNF4A	CYP7A1
HNF4A	FABP2
HNF4A	GK
HNF4A	LPA
HNF4A	PCK1
HNF4A	PPARG
HNRNPK	LDLR
HSF1	PTGS2
JUN	APOA2
JUN	CYP2J2
JUN	APOH
JUN	CYP2C9
JUN	GGT1
JUN	PLA2G4A
JUN	PTGS2
JUND	APOH
JUND	CYP2C9
KLF15	AKR1C3
KLF4	APOE
KLF4	SCARB1
KLF5	PPARA
KLF5	PPARD
KLF5	PPARG
KLF6	PPARA
KLF6	PPARD
KLF6	PPARG
KLF9	PPARA
KLF9	PPARD
KLF9	PPARG
MAFB	FASN
MEF2C	CPT1B
NFAT5	CYP2E1
NFATC1	PTGS2
NFATC2	PTGS2
NFATC4	PPARG
NFE2	TBXAS1
NFE2L2	ABCB11
NFE2L2	CBR1
NFE2L2	CBR3
NFE2L2	FABP4
NFE2L2	GPX2
NFIC	ALOX15
NFIC	APOB
NFYA	FDPS
NFYB	FDFT1
NFYB	HMGCS1
NR0B1	STAR
NR1D1	APOC3
NR1H2	CETP
NR1H3	CETP
NR1H4	ABCB11
NR1H4	LPA
NR1H4	SCARB1
NR1H4	APOA1
NR1H4	PPARA
NR1I2	CYP2B6
NR1I3	CYP2B6
NR2C2	APOE
NR2F1	ALOX5
NR2F1	APOA1
NR2F1	APOA2
NR2F1	APOA4
NR2F1	APOB
NR2F1	APOC3
NR2F1	CPT1B
NR2F1	LIPC
NR2F2	APOA1
NR2F2	APOA4
NR2F2	APOB
NR2F2	APOC3
NR2F2	APOC2
NR2F2	CETP
NR2F2	CYP7A1
NR2F6	APOA2
NR2F6	APOB
NR2F6	APOC3
NR2F6	APOC2
NR3C1	ACAT1
NR3C1	CYP2C9
NR3C1	PLA2G4A
NR3C1	ALOX15B
NR3C1	CYP27A1
NR5A1	STAR
NR5A2	ABCG5
NR5A2	ABCG8
NR5A2	APOA1
NR5A2	CYP7A1
NR5A2	SCARB1
NR5A2	STAR
NR5A2	ADIPOQ
NRF1	LRP1
POU2F1	CYP2B6
POU2F1	CYP2C8
POU2F1	CYP2C9
POU2F1	CYP2J2
POU2F1	HPGDS
POU2F1	LPL
PPARA	ACOX1
PPARA	CD36
PPARA	PTGS2
PPARA	HMGCS2
PPARD	LDLR
PPARG	CD36
RARA	APOA1
RARB	ACADM
RARB	APOA1
RARG	CETP
REL	ALOX12
RELA	ALOX12
RELA	LIPG
RELA	PLA2G4C
RELA	PTGS2
RORA	ALOX5
RORA	APOC3
RORA	CYP2C8
RORA	PPARG
RORA	CYP8B1
RUNX1	ALOX12
RUNX1	CD36
RUNX3	CD36
RXRA	ACADM
RXRA	PLTP
RXRA	APOA1
SMC1A	CYP2B6
SP1	ACADM
SP1	AKR1C3
SP1	ALOX12
SP1	ALOX5
SP1	APOA1
SP1	APOB
SP1	APOE
SP1	CETP
SP1	CPT1A
SP1	CYP27A1
SP1	EPHX2
SP1	LDLR
SP1	LPL
SP1	LTC4S
SP1	PPARD
SP1	PPARG
SP1	PTGES
SP1	PTGS1
SP1	SOAT1
SP1	STAR
SP1	ACLY
SP1	ALOX15
SP1	LCAT
SP3	AKR1C3
SP3	ALOX12
SP3	CETP
SP3	CYP27A1
SP3	LDLR
SP3	LPL
SP3	LTC4S
SP3	PTGES
SP3	TSPO
SP3	LCAT
SREBF1	ACACB
SREBF1	CETP
SREBF1	FASN
SREBF1	LDLR
SREBF1	LRP1
SREBF1	SCD
SREBF1	ACLY
SREBF1	FDFT1
SREBF1	FDPS
SREBF1	PCSK9
SREBF1	PPARG
SREBF1	PTGS2
SREBF1	STAR
SREBF2	ABCA1
SREBF2	FDFT1
SREBF2	LDLR
SREBF2	LRP1
SREBF2	PCSK9
SREBF2	PLA2G6
SREBF2	PTGS2
SREBF2	SCARB1
SREBF2	STAR
SREBF2	FDPS
SREBF2	PPARG
SRF	APOE
STAT1	PTGS2
STAT1	SOAT1
STAT3	CYP2E1
STAT3	LPA
STAT6	ALOX15
STAT6	LTC4S
STAT6	PTGS2
TFAP2A	ABCA1
TFAP2A	APOE
TFAP2A	PPARD
TFAP2A	APOB
TFAP2B	PTGDS
TGIF1	SOAT2
THRB	PCK1
THRB	APOC2
TP53	APOB
TP53	FDFT1
TP53	FDPS
TP53	HMGCR
TP53	LRP1
TP53	MVK
USF1	APOE
USF1	PLA2G4C
USF1	PTGDS
USF1	APOC3
USF2	APOA2
USF2	PTGDS
USF2	PTGS2
USF2	APOC3
XRCC6	ALOX15
YY1	CETP
YY1	STAR
ZBTB17	LDLR
ZEB2	CYP4F3
ZIC1	APOE
ZIC2	APOE
ZNF148	APOB
