# Supplementary material for: Investigation of lipid metabolism dysregulation and the effects on immune microenvironments in pan-cancer using multiple omics data
Source: BMC Bioinformatics. 2019 May 1;20(Suppl 7):195. doi: 10.1186/s12859-019-2734-4 (PMC6509864; doi:10.1186/s12859-019-2734-4)
Supplement: Supplementary file 4 — The correlation of transcripition factor and target pairs in key lipid metabolism pathways. (XLSX 52 kb) [file 12859_2019_2734_MOESM4_ESM.xlsx]

## Sheet: pancencer_tf_targets_cor
The correlation of transcripition factor and target pairs in key lipid pathway
All_tf_target	TF	Targets	COR	P_Value	Cancer	Type
AHR _ PTGS2	AHR	PTGS2	0.139283	0.0176326	KIRP	Ara
CDX2 _ SOAT2	CDX2	SOAT2	0.244552	5.71e-07	BLCA	Chole
CEBPA _ PPARG	CEBPA	PPARG	0.328563	6.3e-29	BRCA	PPAR
CEBPA _ ADIPOQ	CEBPA	ADIPOQ	0.257743	4.8e-18	BRCA	PPAR
CEBPA _ APOB	CEBPA	APOB	0.17022	1.49e-08	BRCA	Chole
CEBPA _ CETP	CEBPA	CETP	0.164128	4.84e-08	BRCA	Chole
CEBPA _ APOA2	CEBPA	APOA2	0.15558	0.000311701	KIRC	Chole
CEBPB _ PTGES	CEBPB	PTGES	0.252428	0.000411993	COAD	Ara
CEBPB _ PTGES	CEBPB	PTGES	0.134442	0.00186663	KIRC	Ara
CEBPB _ PTGS2	CEBPB	PTGS2	0.228427	8.67e-05	KIRP	Ara
CEBPB _ LDLR	CEBPB	LDLR	0.162583	0.00551656	KIRP	Chole
CEBPB _ PTGES	CEBPB	PTGES	0.318783	0.00634851	READ	Ara
CREB3L3 _ CYP7A1	CREB3L3	CYP7A1	0.673704	1.5e-67	LUSC	Ara
CREB3L3 _ CYP27A1	CREB3L3	CYP27A1	0.243494	3.39e-08	LUSC	Chole
EGR1 _ LDLR	EGR1	LDLR	0.17805	0.000301138	BLCA	Chole
EGR1 _ PPARG	EGR1	PPARG	0.221796	1.2e-13	BRCA	PPAR
EGR1 _ LDLR	EGR1	LDLR	0.366385	3.14e-13	LIHC	Chole
EGR1 _ LDLR	EGR1	LDLR	0.221423	3.86e-07	LUAD	Chole
EGR1 _ PTGES	EGR1	PTGES	-0.130551	0.00299561	LUAD	Ara
EGR1 _ LDLR	EGR1	LDLR	0.208561	2.5e-06	LUSC	Chole
EGR1 _ PTGES	EGR1	PTGES	-0.123348	0.00569973	LUSC	Ara
ESR1 _ CYP2C9	ESR1	CYP2C9	0.355714	1.66e-12	LIHC	Ara
FOS _ PTGS2	FOS	PTGS2	0.576419	4.48e-27	KIRP	Ara
FOS _ PTGS2	FOS	PTGS2	0.509869	6.09e-26	LIHC	Ara
FOS _ CYP2C9	FOS	CYP2C9	0.13603	0.00870346	LIHC	Ara
FOXA1 _ APOA1	FOXA1	APOA1	0.154566	0.000341493	KIRC	Chole
FOXA1 _ APOA1	FOXA1	APOA1	-0.110209	0.0139616	PRAD	Chole
FOXA1 _ APOA1	FOXA1	APOA1	0.167369	0.000167583	THCA	Chole
FOXA1 _ APOA1	FOXA1	APOA1	0.153619	0.0417943	UCEC	Chole
FOXA2 _ APOA1	FOXA2	APOA1	0.797295	1.15e-15	ESCA	Chole
FOXA2 _ APOA1	FOXA2	APOA1	0.797295	1.15e-15	KICH	Chole
FOXA2 _ APOA1	FOXA2	APOA1	0.115246	0.00983127	LUSC	Chole
GATA1 _ ALOX15	GATA1	ALOX15	0.0872288	0.0478724	LUAD	Ara
GATA4 _ ABCG5	GATA4	ABCG5	0.352984	5.12e-07	COAD	Chole
GATA4 _ ABCG8	GATA4	ABCG8	0.348888	7.07e-07	COAD	Chole
GATA4 _ CYP2E1	GATA4	CYP2E1	0.264542	0.000208951	COAD	Ara
GATA4 _ ABCG8	GATA4	ABCG8	0.187372	1.7e-05	HNSC	Chole
GATA4 _ ABCG5	GATA4	ABCG5	0.134369	0.0021359	HNSC	Chole
GATA4 _ ABCG8	GATA4	ABCG8	0.101223	0.0234617	LUSC	Chole
GATA4 _ CYP2E1	GATA4	CYP2E1	0.0892447	0.0467523	PRAD	Ara
GATA6 _ CYP2C9	GATA6	CYP2C9	0.376065	9.56e-19	LUAD	Ara
GATA6 _ ALOX15	GATA6	ALOX15	0.204976	2.73e-06	LUAD	Ara
HIF1A _ PTGS2	HIF1A	PTGS2	0.164837	0.000159577	HNSC	Ara
HIF1A _ GPX8	HIF1A	GPX8	0.188434	1.19e-05	KIRC	Ara
HIF1A _ GPX8	HIF1A	GPX8	0.240106	3.46e-08	LUAD	Ara
HIF1A _ ACADL	HIF1A	ACADL	-0.172876	8.03e-05	LUAD	FA
HIF1A _ CBR1	HIF1A	CBR1	-0.113764	0.0097709	LUAD	Ara
HMGA1 _ PTGS2	HMGA1	PTGS2	0.0885782	0.00338028	BRCA	Ara
HNF1A _ ANGPTL3	HNF1A	ANGPTL3	0.352353	1.69e-16	LUAD	Chole
HNF1A _ APOB	HNF1A	APOB	0.203893	3.09e-06	LUAD	Chole
HNF1A _ LPA	HNF1A	LPA	0.168617	0.000120656	LUAD	Chole
HNF1A _ ANGPTL3	HNF1A	ANGPTL3	0.409314	1.69e-21	PRAD	Chole
HNF1B _ APOA1	HNF1B	APOA1	0.141026	0.00155331	LUSC	Chole
HNF4A _ ABCG5	HNF4A	ABCG5	0.235228	5.72e-08	HNSC	Chole
HNF4A _ ABCG8	HNF4A	ABCG8	0.137764	0.0016385	HNSC	Chole
HNF4A _ CYP2C9	HNF4A	CYP2C9	0.444985	2.06e-26	LUAD	Ara
HNF4A _ PPARG	HNF4A	PPARG	0.325124	3.82e-14	LUAD	PPAR
HNF4A _ FABP2	HNF4A	FABP2	0.297678	5.35e-12	LUAD	PPAR
HNF4A _ APOB	HNF4A	APOB	0.285959	3.79e-11	LUAD	Chole
HNF4A _ APOA1	HNF4A	APOA1	0.27023	4.55e-10	LUAD	Chole
HNF4A _ ABCG8	HNF4A	ABCG8	0.181996	3.25e-05	LUAD	Chole
JUN _ PTGS2	JUN	PTGS2	0.265072	2.2e-07	LIHC	Ara
JUN _ CYP2C9	JUN	CYP2C9	0.125115	0.0158989	LIHC	Ara
JUN _ CYP2J2	JUN	CYP2J2	0.120151	0.0143189	STAD	Ara
KLF15 _ AKR1C3	KLF15	AKR1C3	0.124054	3.91e-05	BRCA	Ara
KLF15 _ AKR1C3	KLF15	AKR1C3	0.103452	0.0188599	LUAD	Ara
KLF4 _ APOE	KLF4	APOE	-0.152808	0.00179686	STAD	Chole
KLF5 _ PPARG	KLF5	PPARG	0.143775	0.0012516	LUSC	PPAR
KLF5 _ PPARG	KLF5	PPARG	0.213679	1.53e-06	PRAD	PPAR
KLF6 _ PPARG	KLF6	PPARG	0.196349	5.84e-11	BRCA	PPAR
KLF6 _ PPARA	KLF6	PPARA	0.180188	1.98e-09	BRCA	PPAR
KLF6 _ PPARG	KLF6	PPARG	0.231348	1.1e-07	LUAD	PPAR
KLF6 _ PPARG	KLF6	PPARG	0.125166	0.00502188	LUSC	PPAR
KLF9 _ PPARG	KLF9	PPARG	0.23818	1.46e-15	BRCA	PPAR
KLF9 _ PPARG	KLF9	PPARG	0.148318	0.000691778	HNSC	PPAR
KLF9 _ PPARG	KLF9	PPARG	-0.12254	0.00535917	LUAD	PPAR
MEF2C _ CPT1B	MEF2C	CPT1B	0.156368	0.0382248	UCEC	FA
NFE2 _ TBXAS1	NFE2	TBXAS1	0.194168	0.000887442	KIRP	Ara
NFE2 _ TBXAS1	NFE2	TBXAS1	0.170056	0.000130904	LUSC	Ara
NR0B1 _ STAR	NR0B1	STAR	-0.0922444	0.0390221	LUSC	Chole
NR1H4 _ ABCB11	NR1H4	ABCB11	0.242479	0.000702345	COAD	Chole
NR1H4 _ APOA1	NR1H4	APOA1	0.228193	0.0014556	COAD	Chole
NR1H4 _ SCARB1	NR1H4	SCARB1	0.245206	9.72e-09	KIRC	Chole
NR1H4 _ SCARB1	NR1H4	SCARB1	0.229838	7.81e-05	KIRP	Chole
NR1H4 _ APOA1	NR1H4	APOA1	0.1422	0.0153741	KIRP	Chole
NR1H4 _ ABCB11	NR1H4	ABCB11	-0.11784	0.0449553	KIRP	Chole
NR1H4 _ LPA	NR1H4	LPA	-0.117682	0.045246	KIRP	Chole
NR1I2 _ CYP2B6	NR1I2	CYP2B6	0.251441	1.47e-05	KIRP	Ara
NR1I2 _ CYP2B6	NR1I2	CYP2B6	0.425356	9.82e-18	LIHC	Ara
NR1I3 _ CYP2B6	NR1I3	CYP2B6	0.793186	1.83e-116	KIRC	Ara
NR2F1 _ CPT1B	NR2F1	CPT1B	-0.122083	0.0136014	BLCA	FA
NR2F1 _ ALOX5	NR2F1	ALOX5	0.137359	0.0192765	KIRP	Ara
NR2F1 _ ALOX5	NR2F1	ALOX5	0.334472	1.47e-14	LUSC	Ara
NR2F1 _ LIPC	NR2F1	LIPC	-0.101081	0.0395679	STAD	Chole
NR3C1 _ ACAT1	NR3C1	ACAT1	-0.201495	2.74e-06	KIRC	FA
NR5A1 _ STAR	NR5A1	STAR	0.132161	0.00303888	LUSC	Chole
NR5A1 _ STAR	NR5A1	STAR	0.310492	2.74e-05	UCEC	Chole
NR5A2 _ ADIPOQ	NR5A2	ADIPOQ	0.260094	2.33e-18	BRCA	PPAR
NR5A2 _ CYP7A1	NR5A2	CYP7A1	0.0859954	0.0044401	BRCA	Ara
NR5A2 _ ABCG8	NR5A2	ABCG8	0.196974	0.00617369	COAD	Chole
NR5A2 _ ABCG5	NR5A2	ABCG5	0.173696	0.0159777	COAD	Chole
NR5A2 _ ABCG8	NR5A2	ABCG8	0.171585	6.85e-05	KIRC	Chole
NR5A2 _ APOA1	NR5A2	APOA1	0.171432	6.95e-05	KIRC	Chole
NR5A2 _ ABCG5	NR5A2	ABCG5	0.166946	0.000107762	KIRC	Chole
NR5A2 _ APOA1	NR5A2	APOA1	0.568506	3.13e-44	LUSC	Chole
NR5A2 _ ABCG8	NR5A2	ABCG8	0.511652	8.96e-35	LUSC	Chole
NR5A2 _ CYP7A1	NR5A2	CYP7A1	0.478628	4.76e-30	LUSC	Ara
PPARA _ PTGS2	PPARA	PTGS2	0.134595	8.01e-06	BRCA	Ara
PPARG _ CD36	PPARG	CD36	0.396322	2e-42	BRCA	Chole
RARG _ CETP	RARG	CETP	-0.121181	0.00661469	LUSC	Chole
RUNX1 _ CD36	RUNX1	CD36	0.21562	0.0026679	COAD	Chole
RUNX1 _ CD36	RUNX1	CD36	-0.195472	5.46e-06	KIRC	Chole
RUNX1 _ CD36	RUNX1	CD36	0.149239	0.0109362	KIRP	Chole
RUNX1 _ CD36	RUNX1	CD36	0.214214	1.07e-05	STAD	Chole
RUNX3 _ CD36	RUNX3	CD36	-0.223884	1.76e-07	KIRC	Chole
RUNX3 _ CD36	RUNX3	CD36	0.256928	9.38e-06	KIRP	Chole
SREBF1 _ SCD	SREBF1	SCD	0.543117	1.11e-32	BLCA	FA
SREBF1 _ FASN	SREBF1	FASN	0.493932	1.75e-26	BLCA	FA
SREBF1 _ LDLR	SREBF1	LDLR	0.263835	6.34e-08	BLCA	Chole
SREBF1 _ PCSK9	SREBF1	PCSK9	0.197957	5.67e-05	BLCA	Chole
SREBF1 _ ACLY	SREBF1	ACLY	0.157721	0.00139322	BLCA	FA
SREBF1 _ SCD	SREBF1	SCD	0.654623	2.49e-09	ESCA	FA
SREBF1 _ SCD	SREBF1	SCD	0.654623	2.49e-09	KICH	FA
SREBF1 _ SCD	SREBF1	SCD	0.368028	1.63e-17	THCA	FA
SREBF1 _ ACACB	SREBF1	ACACB	-0.357979	1.36e-16	THCA	FA
SREBF1 _ PCSK9	SREBF1	PCSK9	0.204373	3.99e-06	THCA	Chole
SREBF1 _ PCSK9	SREBF1	PCSK9	0.372055	3.69e-07	UCEC	Chole
SREBF1 _ SCD	SREBF1	SCD	0.342803	3.2e-06	UCEC	FA
SREBF1 _ FASN	SREBF1	FASN	0.185476	0.0137201	UCEC	FA
SREBF1 _ LRP1	SREBF1	LRP1	-0.184762	0.0140942	UCEC	Chole
SREBF1 _ ACACB	SREBF1	ACACB	-0.178599	0.0177112	UCEC	FA
SREBF2 _ LDLR	SREBF2	LDLR	0.557924	6.18e-45	KIRC	Chole
SREBF2 _ PCSK9	SREBF2	PCSK9	0.367809	1.62e-18	KIRC	Chole
SREBF2 _ ABCA1	SREBF2	ABCA1	-0.212392	7.48e-07	KIRC	Chole
SREBF2 _ SCARB1	SREBF2	SCARB1	-0.1911	8.89e-06	KIRC	Chole
SREBF2 _ LDLR	SREBF2	LDLR	0.61939	4.1e-32	KIRP	Chole
SREBF2 _ PCSK9	SREBF2	PCSK9	0.225975	0.000103634	KIRP	Chole
SREBF2 _ PTGS2	SREBF2	PTGS2	0.189644	0.00117422	KIRP	Ara
STAT3 _ CYP2E1	STAT3	CYP2E1	-0.297363	0.0153187	ESCA	Ara
STAT3 _ CYP2E1	STAT3	CYP2E1	-0.297363	0.0153187	KICH	Ara
TFAP2A _ ABCA1	TFAP2A	ABCA1	-0.208138	1.25e-06	KIRC	Chole
TFAP2B _ PTGDS	TFAP2B	PTGDS	0.158322	0.000395559	PRAD	Ara
TGIF1 _ SOAT2	TGIF1	SOAT2	0.284695	0.0205117	ESCA	Chole
TGIF1 _ SOAT2	TGIF1	SOAT2	0.284695	0.0205117	KICH	Chole
THRB _ APOC2	THRB	APOC2	-0.115667	0.00012684	BRCA	Chole
THRB _ PCK1	THRB	PCK1	0.0913601	0.00250046	BRCA	PPAR
THRB _ PCK1	THRB	PCK1	0.161086	0.0256089	COAD	PPAR
THRB _ APOC2	THRB	APOC2	-0.202703	0.000514454	KIRP	Chole
USF2 _ PTGDS	USF2	PTGDS	-0.30785	0.0119168	ESCA	Ara
USF2 _ PTGDS	USF2	PTGDS	-0.30785	0.0119168	KICH	Ara
ZEB2 _ CYP4F3	ZEB2	CYP4F3	-0.158431	0.000371115	LUSC	Ara
ZIC2 _ APOE	ZIC2	APOE	0.11207	0.0124183	PRAD	Chole
