# Supplementary material for: Investigation of lipid metabolism dysregulation and the effects on immune microenvironments in pan-cancer using multiple omics data
Source: BMC Bioinformatics. 2019 May 1;20(Suppl 7):195. doi: 10.1186/s12859-019-2734-4 (PMC6509864; doi:10.1186/s12859-019-2734-4)
Supplement: Supplementary file 5 — The correlation of gene expression and immune cell proportion in key lipid metabolism pathways. (XLSX 51 kb) [file 12859_2019_2734_MOESM5_ESM.xlsx]

## Sheet: sheet1
The correlation of gene expression and immune cell proportion in key lipid pathway
gene	gene.immune.cell	immune.cell	cor	P.value	P_adjust	TUMOR	pathway
ACOT7	ACOT7_T.cells.CD4.memory.activated	T.cells.CD4.memory.activated	0.7	1.16e-05	0.00534564	KIRP	FA
ACSBG1	ACSBG1_Dendritic.cells.resting	Dendritic.cells.resting	0.762304	1.81e-23	8.04e-20	BRCA	FA
ACSBG1	ACSBG1_Dendritic.cells.resting	Dendritic.cells.resting	0.762304	1.81e-23	8.04e-20	BRCA	PPAR
ACSL6	ACSL6_Dendritic.cells.activated	Dendritic.cells.activated	0.70603	3.52e-09	6.01e-06	PRAD	FA
ACSL6	ACSL6_Eosinophils	Eosinophils	0.725394	3.74e-08	9.22e-05	HNSC	FA
ACSL6	ACSL6_Dendritic.cells.activated	Dendritic.cells.activated	0.70603	3.52e-09	6.01e-06	PRAD	PPAR
ACSL6	ACSL6_Eosinophils	Eosinophils	0.725394	3.74e-08	9.22e-05	HNSC	PPAR
ACSS3	ACSS3_Neutrophils	Neutrophils	0.839555	5.49e-07	0.000761669	UCEC	FA
ADIPOQ	ADIPOQ_B.cells.memory	B.cells.memory	0.967792	1.91e-05	0.011099	READ	PPAR
ALOX15	ALOX15_B.cells.memory	B.cells.memory	0.703317	0.000375488	0.0405856	BLCA	AA
ANGPTL3	ANGPTL3_Eosinophils	Eosinophils	0.744249	0.000109462	0.0201529	BLCA	CHOL
ANGPTL3	ANGPTL3_Eosinophils	Eosinophils	0.903432	1.34e-25	2.97e-21	LUAD	CHOL
APOA2	APOA2_Dendritic.cells.resting	Dendritic.cells.resting	0.746066	5.47e-14	1.96e-11	KIRC	CHOL
APOA2	APOA2_Dendritic.cells.resting	Dendritic.cells.resting	0.746066	5.47e-14	1.96e-11	KIRC	PPAR
APOB	APOB_Eosinophils	Eosinophils	0.806932	9.88e-06	0.00595146	BLCA	CHOL
AQP7	AQP7_Neutrophils	Neutrophils	0.716068	0.000121779	0.0351071	UCEC	PPAR
AQP7	AQP7_T.cells.regulatory..Tregs.	T.cells.regulatory..Tregs.	0.721039	0.000225986	0.0296831	BLCA	PPAR
CBR3	CBR3_Mast.cells.activated	Mast.cells.activated	0.734685	2.05e-13	6.89e-11	KIRC	AA
CD36	CD36_T.cells.CD4.naive	T.cells.CD4.naive	0.807907	9.45e-06	0.00595146	BLCA	CHOL
CD36	CD36_T.cells.CD4.naive	T.cells.CD4.naive	0.807907	9.45e-06	0.00595146	BLCA	PPAR
CETP	CETP_Eosinophils	Eosinophils	0.732538	1.4e-05	0.0159614	STAD	CHOL
CPT1B	CPT1B_B.cells.memory	B.cells.memory	0.769968	4.46e-05	0.0128575	BLCA	FA
CPT1B	CPT1B_B.cells.memory	B.cells.memory	0.769968	4.46e-05	0.0128575	BLCA	PPAR
CYP2B6	CYP2B6_Dendritic.cells.resting	Dendritic.cells.resting	0.933456	6.88e-33	7.64e-30	KIRC	AA
CYP2B6	CYP2B6_Monocytes	Monocytes	0.750039	3.77e-05	0.00447521	KICH	AA
CYP4F3	CYP4F3_Mast.cells.activated	Mast.cells.activated	0.808053	9.57e-18	5.59e-15	KIRC	AA
CYP8B1	CYP8B1_Eosinophils	Eosinophils	0.709946	0.000311863	0.0358691	BLCA	PPAR
CYP8B1	CYP8B1_Eosinophils	Eosinophils	0.831793	2.85e-18	7.91e-15	LUAD	PPAR
EHHADH	EHHADH_Monocytes	Monocytes	0.715496	0.000124028	0.0122363	KICH	FA
EHHADH	EHHADH_Monocytes	Monocytes	0.715496	0.000124028	0.0122363	KICH	PPAR
ELOVL2	ELOVL2_B.cells.memory	B.cells.memory	0.731087	7.41e-05	0.0247822	UCEC	FA
ELOVL3	ELOVL3_Macrophages.M0	Macrophages.M0	0.716828	1.43e-12	4.29e-10	KIRC	FA
ELOVL4	ELOVL4_Dendritic.cells.resting	Dendritic.cells.resting	0.765966	8.3e-24	5.99e-20	BRCA	FA
FABP2	FABP2_Eosinophils	Eosinophils	0.87881	1.45e-22	1.61e-18	LUAD	PPAR
FABP4	FABP4_Mast.cells.activated	Mast.cells.activated	0.784753	1.74e-07	0.00020796	KIRP	PPAR
GGT1	GGT1_Neutrophils	Neutrophils	0.926893	2.13e-10	1.07e-07	KICH	AA
GGT1	GGT1_T.cells.CD4.memory.activated	T.cells.CD4.memory.activated	0.990924	8.65e-20	1.28e-16	KICH	AA
GPX2	GPX2_Dendritic.cells.resting	Dendritic.cells.resting	0.963213	1.11e-41	2.74e-38	KIRC	AA
GPX2	GPX2_T.cells.gamma.delta	T.cells.gamma.delta	0.921026	2.11e-13	2.34e-09	KIRP	AA
HMGCS2	HMGCS2_Dendritic.cells.resting	Dendritic.cells.resting	0.93374	5.95e-33	6.95e-30	KIRC	PPAR
HMGCS2	HMGCS2_T.cells.CD8	T.cells.CD8	0.733346	2.69e-06	0.00180947	KIRP	PPAR
LRP2	LRP2_T.cells.gamma.delta	T.cells.gamma.delta	1	3.19e-19	1.42e-15	READ	CHOL
OLAH	OLAH_Dendritic.cells.activated	Dendritic.cells.activated	0.966531	5.17e-30	2.3e-26	LIHC	FA
PCK1	PCK1_Dendritic.cells.activated	Dendritic.cells.activated	0.712854	0.000134903	0.0129635	KICH	PPAR
PCK1	PCK1_Plasma.cells	Plasma.cells	0.71921	1.11e-12	3.42e-10	KIRC	PPAR
PCSK9	PCSK9_B.cells.memory	B.cells.memory	0.773128	3.97e-05	0.0119689	BLCA	CHOL
PLA2G1B	PLA2G1B_NK.cells.resting	NK.cells.resting	0.768359	1.85e-05	0.00838088	UCEC	AA
PLA2G2C	PLA2G2C_Eosinophils	Eosinophils	0.840374	5.98e-19	2.21e-15	LUAD	AA
PLA2G2F	PLA2G2F_Dendritic.cells.resting	Dendritic.cells.resting	0.764735	1.08e-23	5.99e-20	BRCA	AA
PLA2G4B	PLA2G4B_Dendritic.cells.resting	Dendritic.cells.resting	0.946678	0.000109387	0.0466956	READ	AA
PLA2G4F	PLA2G4F_B.cells.naive	B.cells.naive	0.701725	6.58e-12	1.76e-09	KIRC	AA
PLA2G5	PLA2G5_T.cells.CD4.naive	T.cells.CD4.naive	0.973935	9.18e-06	0.00702681	READ	AA
PLTP	PLTP_Neutrophils	Neutrophils	0.920657	4.89e-10	2.26e-07	KICH	CHOL
PLTP	PLTP_T.cells.CD4.memory.activated	T.cells.CD4.memory.activated	0.983027	5.98e-17	6.99e-14	KICH	CHOL
PLTP	PLTP_Neutrophils	Neutrophils	0.920657	4.89e-10	2.26e-07	KICH	PPAR
PLTP	PLTP_T.cells.CD4.memory.activated	T.cells.CD4.memory.activated	0.983027	5.98e-17	6.99e-14	KICH	PPAR
PTGDS	PTGDS_Neutrophils	Neutrophils	0.886138	1.86e-08	5.29e-06	KICH	AA
PTGDS	PTGDS_T.cells.CD4.memory.activated	T.cells.CD4.memory.activated	0.988029	1.56e-18	2.16e-15	KICH	AA
PTGDS	PTGDS_T.cells.CD8	T.cells.CD8	0.70412	0.000176974	0.0161665	KICH	AA
PTGIS	PTGIS_Plasma.cells	Plasma.cells	0.73656	6.13e-05	0.00684903	KICH	AA
PTGS1	PTGS1_T.cells.CD4.naive	T.cells.CD4.naive	0.95381	6.66e-05	0.032853	READ	AA
SCARB1	SCARB1_Neutrophils	Neutrophils	0.717284	0.000117111	0.0118705	KICH	CHOL
SCARB1	SCARB1_T.cells.CD4.memory.activated	T.cells.CD4.memory.activated	0.846787	3.5e-07	7.77e-05	KICH	CHOL
SCD5	SCD5_T.cells.gamma.delta	T.cells.gamma.delta	0.952456	7.36e-05	0.0340369	READ	FA
SCD5	SCD5_T.cells.gamma.delta	T.cells.gamma.delta	0.952456	7.36e-05	0.0340369	READ	PPAR
STAR	STAR_B.cells.memory	B.cells.memory	0.761678	3.85e-12	7.77e-09	THCA	CHOL
STAR	STAR_Eosinophils	Eosinophils	0.798395	6.03e-07	0.0019122	STAD	CHOL
STAR	STAR_T.cells.gamma.delta	T.cells.gamma.delta	0.7218	0.000101113	0.0316128	UCEC	CHOL
