# Supplementary material for: Investigation of lipid metabolism dysregulation and the effects on immune microenvironments in pan-cancer using multiple omics data
Source: BMC Bioinformatics. 2019 May 1;20(Suppl 7):195. doi: 10.1186/s12859-019-2734-4 (PMC6509864; doi:10.1186/s12859-019-2734-4)
Supplement: Supplementary file 6 — Candidate lipid metabolism genes. (XLSX 39 kb) [file 12859_2019_2734_MOESM6_ESM.xlsx]

## Sheet: lipid_gene
Candidate lipid genes
ACSL1
ACSL3
ACSL4
FASN
ACSBG1
ACSL6
MCAT
ACACA
ACACB
ACSL5
OXSM
OLAH
ACSBG2
ACAA2
ACOT2
ACOT7
THEM4
ACOT4
ECHS1
HACD2
THEM5
HADHA
HADHB
HADH
HACD4
MECR
HSD17B12
HACD3
ELOVL2
PPT1
ELOVL5
ACOT1
ELOVL1
ELOVL4
ELOVL6
ELOVL7
ELOVL3
HACD1
PPT2
TECR
ECI2
ADH1A
ADH1B
ADH1C
CPT1C
ADH4
ADH5
ADH6
ADH7
CPT1A
CPT1B
CPT2
CYP4A11
ECI1
EHHADH
ALDH2
ALDH1B1
ALDH9A1
ALDH3A2
GCDH
CYP4A22
ACAA1
ACADL
ACADM
ACADS
ACADSB
ACADVL
ACAT1
ACAT2
ALDH7A1
ACOX1
ACOX3
HMGCL
HMGCS1
HMGCS2
OXCT1
HMGCLL1
BDH2
BDH1
OXCT2
CEL
EBP
CYP2R1
CYP24A1
CYP27B1
CYP51A1
DHCR7
DHCR24
FDFT1
LIPA
LSS
NSDHL
HSD17B7
MSMO1
SC5D
SOAT1
SQLE
TM7SF2
SOAT2
ACOT8
CYP46A1
SLC27A5
AKR1C4
CYP7A1
CYP8B1
CYP27A1
AMACR
HSD17B4
CYP39A1
BAAT
SCP2
AKR1D1
HSD3B7
ACOX2
CH25H
CYP7B1
CYP3A7-CYP3A51P
UGT2B11
UGT2A1
COMT
CYP1A1
CYP1A2
CYP1B1
CYP3A7
CYP2E1
CYP3A4
CYP3A5
CYP11A1
CYP11B1
CYP11B2
CYP17A1
CYP19A1
CYP21A2
AKR1C1
AKR1C2
LRTOMT
HSD3B1
HSD3B2
HSD11B1
HSD11B2
HSD17B1
HSD17B3
HSD17B2
STS
UGT2B28
UGT1A10
UGT1A8
UGT1A7
UGT1A6
UGT1A5
UGT1A9
UGT1A4
UGT1A1
UGT1A3
UGT2A2
SRD5A1
SRD5A2
SULT1E1
SULT2B1
UGT2B4
UGT2B7
UGT2B10
UGT2B15
UGT2B17
HSD17B8
SRD5A3
UGT2A3
HSD17B6
AKR1C3
PLA2G4B
LPCAT3
CEPT1
CDS1
PEMT
CDIPT
LYPLA1
AGPAT1
AGPAT2
PNPLA6
CHAT
PLA2G16
CHKA
CHKB
LYPLA2
PLD4
PLA2G4E
MBOAT2
GPAT4
DGKK
GPAT2
PLB1
MBOAT1
DGKA
DGKB
DGKG
DGKH
DGKQ
PHOSPHO1
PLPP4
GPD1L
LPIN1
PLD3
PLA2G15
PISD
LCLAT1
LPCAT4
PLA2G4F
PLA2G2D
GPD1
GPD2
PLA2G4D
PLA2G2E
PNPLA7
PLA2G2C
LCAT
ACHE
PLA2G3
PCYT1A
PLA2G1B
PLA2G2A
PLA2G4A
PLA2G5
PLD1
PLD2
CRLS1
LPCAT2
ETNK2
AGPAT5
ETNK1
GPCPD1
AGPAT3
AGPAT4
ADPRM
CHPT1
GPAM
PCYT2
PLA2G2F
ETNPPL
LPIN3
TAZ
MBOAT7
LPCAT1
PTDSS2
PLA2G12A
PLA2G6
PLA2G10
GNPAT
PLPP5
PLA2G12B
GPAT3
DGKZ
DGKE
DGKD
SELENOI
PLA2G4C
PLPP1
PLPP2
PLPP3
JMJD7-PLA2G4B
CDS2
DGKI
PCYT1B
PGS1
LPIN2
PTDSS1
LPGAT1
ENPP6
TMEM86B
GDPD1
PAFAH1B1
PAFAH1B2
PAFAH1B3
PAFAH2
ENPP2
UGT8
GDPD3
PLA2G7
AGPS
GAL3ST1
PTGES3
CYP4F8
CYP2U1
FAM213B
CYP2B6
CYP2C19
CYP2C8
CYP2C9
CYP2J2
EPHX2
ALOX12
ALOX5
ALOX12B
ALOX15
ALOX15B
GPX6
GGT1
GGT5
HPGDS
GPX1
GPX2
GPX3
GPX5
GPX7
LTA4H
CYP4F3
LTC4S
GPX8
PTGDS
PTGIS
PTGS1
PTGS2
TBXAS1
PTGES2
CYP4F2
CBR1
CBR3
PTGES
FADS2
SPTLC1
CERS1
NEU3
DEGS2
ACER1
NEU4
SGPP2
SGMS2
CERS3
KDSR
CERS6
GALC
SGMS1
GBA
GLA
GLB1
CERS2
ENPP7
ACER2
ARSA
ASAH1
NEU1
NEU2
SPTLC3
ACER3
SMPD3
SMPD4
ASAH2
SPHK2
GBA2
CERK
SMPD1
SMPD2
UGCG
CERS4
SGPP1
DEGS1
SPHK1
SGPL1
CERS5
B4GALT6
SPTLC2
FADS1
PECR
SCD
SCD5
AKT3
CDKN1A
CDKN1B
EGLN2
EGLN3
CREBBP
CYBB
EDN1
EGF
EGFR
EIF4E
EIF4EBP1
ENO1
ENO2
ENO3
EP300
EPO
ERBB2
AKT1
AKT2
ALDOA
FLT1
MTOR
EIF4E1B
GAPDH
ANGPT1
ANGPT2
MKNK2
HIF1A
HK1
HK2
HK3
HMOX1
IFNG
IFNGR1
IFNGR2
IGF1
IGF1R
IL6
IL6R
INS
INSR
ENO4
LDHA
ARNT
LTBR
NFKB1
NOS2
NOS3
NPPA
SERPINE1
ANGPT4
PDHA1
PDHA2
PDHB
PDK1
PFKFB3
PFKL
PGK1
PIK3CA
PIK3CB
PIK3CD
PIK3R1
PIK3R2
PLCG1
PLCG2
EGLN1
PRKCA
PRKCB
PRKCG
MAPK1
MAPK3
MAP2K1
MAP2K2
BCL2
RELA
RPS6
RPS6KB1
RPS6KB2
SLC2A1
STAT3
ELOC
ELOB
TEK
TF
TFRC
TIMP1
TLR4
VEGFA
VHL
HKDC1
CAMK2A
CAMK2B
CAMK2D
CAMK2G
CUL2
PIK3R3
MKNK1
EIF4E2
RBX1
GNA13
ADORA1
ADORA3
MAPK14
CTSD
S1PR1
S1PR3
FCER1A
MS4A2
FCER1G
PLCB1
FYN
GNA12
GNAI1
GNAI2
GNAI3
GNAQ
PPP2R3B
HRAS
KRAS
RHOA
MAP3K5
ABCC1
NRAS
OPRD1
PDPK1
PLCB2
PLCB3
PLCB4
S1PR5
PPP2R3C
PPP2CA
PPP2CB
PPP2R1A
PPP2R1B
PPP2R2A
PPP2R2B
PPP2R2C
PPP2R3A
PPP2R5A
PPP2R5B
PPP2R5C
PPP2R5D
PPP2R5E
PRKCE
PPP2R2D
PRKCZ
MAPK8
MAPK11
MAPK9
MAPK10
MAPK13
PTEN
BAX
RAC1
RAC2
RAC3
RAF1
ROCK1
BDKRB2
MAPK12
BID
TNF
TNFRSF1A
TP53
TRAF2
NSMAF
S1PR4
TRADD
S1PR2
ROCK2
GAB2
CAMKK2
PPARGC1A
CHUK
AGRP
G6PC
IKBKB
IRS1
JAK2
LEP
LEPR
NFKBIA
NFKBIB
NFKBIE
NPY
PCK1
PCK2
ADIPOR1
PRKAG2
PRKAG3
POMC
PPARA
PRKAA1
PRKAA2
PRKAB1
PRKAB2
PRKAG1
PRKCQ
PTPN11
G6PC2
RXRA
RXRB
RXRG
SLC2A4
STK11
TNFRSF1B
ADIPOR2
IRS4
IKBKG
IRS2
SOCS3
G6PC3
ADIPOQ
CD36
ADCY1
ADCY2
CGA
ADCY3
ADCY5
ADCY6
ADCY7
MGLL
ADCY8
ADCY9
ADRB1
ADRB2
ADRB3
ADCY4
FABP4
GNAS
AQP7
LIPE
NPR1
NPY1R
ABHD5
PDE3B
PLIN1
PRKACA
PRKACB
PRKACG
PRKG1
PRKG2
PNPLA2
PTGER3
TSHB
TSHR
SLC27A4
CLPS
ABCA1
FABP1
FABP2
GOT2
NPC1L1
APOA1
APOA4
APOB
MOGAT3
MTTP
PNLIP
PNLIPRP1
PNLIPRP2
ABCG5
ABCG8
MOGAT2
DGAT2
LIPF
DGAT1
SCARB1
ABCC4
SLCO1B1
CFTR
SLC22A7
SLC51B
ABCC2
SLC51A
EPHX1
ATP1B4
SLCO1B3
HMGCR
SLCO1B7
AQP8
AQP1
AQP4
AQP9
KCNN2
LDLR
ATP1A1
ATP1A2
ATP1A3
ATP1A4
ATP1B1
ATP1B2
ATP1B3
FXYD2
ABCB1
ABCB4
NCEH1
SLC4A5
SCTR
SLC4A2
SLC5A1
SLC9A1
SLC9A3
SLC10A1
SLC10A2
SLCO1A2
SLC22A1
SULT2A1
CA2
NR0B2
ABCB11
SLC4A4
ABCC3
SLC22A8
ABCG2
NR1H4
NPC2
CETP
STARD3
OSBPL5
PCSK9
LDLRAP1
ANGPTL3
MYLIP
APOA2
APOC1
APOC2
APOC3
APOE
APOH
LIPC
LPA
LPL
LRP1
LRP2
LRPAP1
NPC1
ANGPTL4
PLTP
ANGPTL8
SORT1
STAR
TSPO
VDAC1
VDAC2
VDAC3
VAPB
VAPA
LIPG
AKR1A1
MOGAT1
PNLIPRP3
GLYCTK
AKR1B1
TKFC
GK
GK2
AGK
AKR1B10
PNPLA3
ACSS1
ACSS2
ACSS3
MLYCD
SCD1
ACLY
MVK
PMVK
MVD
IDI1
IDI2
FDPS
GGPS1
SREBP2
ADAR
AHR
AP2B1
APEX1
AR
ARNTL
ARNTL2
ATF1
ATF2
ATF3
ATF4
BACH1
BCL6
BHLHE40
BRCA1
BRD4
CCDC6
CDX1
CDX2
CEBPA
CEBPB
CEBPD
CREB1
CREB3L3
CREM
CTCF
CTNNB1
CUX1
CXXC1
DDB2
DDIT3
DLX3
DND1
E2F1
E2F2
E2F3
E2F4
EGR1
EGR2
EGR4
ELF1
ELF3
ELK1
EPAS1
ERG
ESR1
ESR2
ESRRA
ETS1
ETS2
ETV4
ETV7
FANCD2
FLI1
FOS
FOSL1
FOXA1
FOXA2
FOXA3
FOXD1
FOXL2
FOXM1
FOXO1
FOXO3
GABPA
GATA1
GATA2
GATA3
GATA4
GATA6
GBX2
GE
GFI1
GLI1
GLI2
GLI3
HBP1
HDAC1
HES1
HEY2
HIC1
HINFP
HIVEP1
HLTF
HMGA1
HMGB2
HNF1A
HNF1B
HNF4A
HNF4G
HNRNPA1
HNRNPK
HOXA10
HOXB13
HOXC6
HSF1
IKZF1
IRF1
IRF2
IRF3
IRF4
IRF5
IRF8
JUN
JUNB
JUND
KDM5A
KLF11
KLF15
KLF16
KLF2
KLF4
KLF5
KLF6
KLF9
KLLN
LHX2
LITAF
LMO2
LRPPRC
LTF
LYL1
MAF
MAFB
MED1
MEF2A
MEF2C
MEOX2
MITF
MTF1
MYB
MYBL2
MYC
MYOD1
MZF1
NFAT5
NFATC1
NFATC2
NFE2
NFE2L2
NFIC
NFYA
NFYB
NFYC
NKRF
NKX2-1
NKX2-2
NKX2-5
NOTCH1
NR0B1
NR1D1
NR1H2
NR1H3
NR1I2
NR1I3
NR2C1
NR2C2
NR2F1
NR2F2
NR2F6
NR3C1
NR3C2
NR4A1
NR4A2
NR5A1
NR5A2
NRF1
NULL
OLIG2
ONECUT1
PARK2
PARP1
PAX2
PAX5
PAX6
PAX8
PBX1
PDX1
PES1
PGR
PITX1
POU1F1
POU2AF1
POU2F1
POU2F2
POU5F1
PPARD
PPARG
PRDM2
PURA
PURB
RAD9A
RARA
RARB
RARG
RBPJ
REL
REST
RORA
RUNX1
RUNX2
RUNX3
SALL2
SATB1
SMAD2
SMAD3
SMAD4
SMARCA2
SMC1A
SNAI1
SOX30
SP1
SP2
SP3
SP4
SPDEF
SPI1
SREBF1
SREBF2
SRF
STAT1
STAT4
STAT5A
STAT5B
STAT6
TAL1
TBP
TBPL1
TBX5
TCF3
TCF7
TCF7L2
TEAD3
TEAD4
TFAP2A
TFAP2B
TFAP2C
TFAP2D
TFAP4
TFCP2
TFCP2L1
TFDP1
TFE3
TGIF1
THRA
THRB
TP63
TP73
TRERF1
TRPS1
TWIST1
TXK
UBP1
USF1
USF2
UTF1
VDR
VEZF1
XBP1
XPA
XRCC5
XRCC6
YAP1
YBX1
YY1
ZBED1
ZBTB17
ZBTB2
ZBTB33
ZBTB5
ZBTB7A
ZEB2
ZIC1
ZIC2
ZNF148
ZNF202
ZNF35
ZNF350
SORBS1
SLC27A2
APOA5
PLIN2
DBI
FABP3
FABP5
FABP6
FABP7
SLC27A6
ILK
SLC27A1
ME1
MMP1
PLIN5
OLR1
PLIN4
UBC
UCP1
